# Supplementary material
Source: publisher figshare collection journal article supplement (https://sage.figshare.com/ndownloader/files/13569089)
Supplement: Supplementary file 1 [file 13569089]

| Date                                         | Problem                                                                                                                                                                | Cause of the problem                                                                | Moral evaluation                                                                     | Solution to the problem                                                                                                                                                    |
|----------------------------------------------|------------------------------------------------------------------------------------------------------------------------------------------------------------------------|-------------------------------------------------------------------------------------|--------------------------------------------------------------------------------------|----------------------------------------------------------------------------------------------------------------------------------------------------------------------------|
| 29 <sup>th</sup> June – 6 <sup>th</sup> July | Hamas has kidnapped Israeli teenagers.                                                                                                                                 | Hamas is a terror organisation.                                                     | Hamas murders children.                                                              | Hamas should release the kidnapped boys or pay the price                                                                                                                   |
| Example Tweets                               |                                                                                       |   |   |                                                                                         |
| 7 <sup>th</sup> - 12 <sup>th</sup> July      | Hamas fires rockets at Israel.                                                                                                                                         | Hamas is a terror organisation intent on destroying Israel.                         | Hamas is evil, targets civilians                                                     | Hamas is responsible for Gaza and should stop launching rockets. Israel's military operation needed to bring peace.                                                        |
| Example Tweets                               |   |  |  |   |

|                                          |                                                                                                                                                                     |                                                                                    |                                                                                                                                                                         |                                                                                                                                                                                                                                                      |
|------------------------------------------|---------------------------------------------------------------------------------------------------------------------------------------------------------------------|------------------------------------------------------------------------------------|-------------------------------------------------------------------------------------------------------------------------------------------------------------------------|------------------------------------------------------------------------------------------------------------------------------------------------------------------------------------------------------------------------------------------------------|
| 13 <sup>th</sup> – 16 <sup>th</sup> July | <p>Hamas is a military organisation conducting war crimes and is rejecting a ceasefire.</p>                                                                         | <p>Hamas is intent on destroying Israel.</p>                                       | <p>Hamas launches rockets from civilian areas, Israel is the most moral army in the world and avoids civilian casualties.</p>                                           | <p>International condemnation of Hamas and acceptance of the Egyptian ceasefire (accepted by Israel on the 15<sup>th</sup>).</p>                                                                                                                     |
|                                          |   |  |   |   |
| 17 <sup>th</sup> July                    | <p>Hamas is a powerful military organisation and is infiltrating Israel through tunnels. Hamas is rejecting ceasefire.</p>                                          | <p>Hamas is a terror organisation.</p>                                             | <p>Hamas uses people as human shields whilst Israel opens a humanitarian window with the UN.</p>                                                                        | <p>A ground operation in order to restore peace and destroy tunnels.</p>                                                                                                                                                                             |

|                                          |                                                                                                                                                                                                                                                                                                                                                                                                                                                                                                                                                                                                                                                                                                                                                                                                                                                                                                                                                                                                                                        |                                                                                                                                                                                                                                                                                                                                                                                                                                                                                                                                                                                                                                                                                                                                                                                                                                                                                                                                                                                                                          |                                                                                                                                                                                                                                                                                                                                                                                                                                                                                                                                                                                                                                                                                                                                                                                                                                                                                                                                                                                                                                                                                                                                                                                                                                                                                                                                                                                        |                                                                                                                                                                                                                                                                                                                                                                                                                                                                                                                                                                                                                                                                                                                                                                                                                                                                                                                                                                                               |
|------------------------------------------|----------------------------------------------------------------------------------------------------------------------------------------------------------------------------------------------------------------------------------------------------------------------------------------------------------------------------------------------------------------------------------------------------------------------------------------------------------------------------------------------------------------------------------------------------------------------------------------------------------------------------------------------------------------------------------------------------------------------------------------------------------------------------------------------------------------------------------------------------------------------------------------------------------------------------------------------------------------------------------------------------------------------------------------|--------------------------------------------------------------------------------------------------------------------------------------------------------------------------------------------------------------------------------------------------------------------------------------------------------------------------------------------------------------------------------------------------------------------------------------------------------------------------------------------------------------------------------------------------------------------------------------------------------------------------------------------------------------------------------------------------------------------------------------------------------------------------------------------------------------------------------------------------------------------------------------------------------------------------------------------------------------------------------------------------------------------------|----------------------------------------------------------------------------------------------------------------------------------------------------------------------------------------------------------------------------------------------------------------------------------------------------------------------------------------------------------------------------------------------------------------------------------------------------------------------------------------------------------------------------------------------------------------------------------------------------------------------------------------------------------------------------------------------------------------------------------------------------------------------------------------------------------------------------------------------------------------------------------------------------------------------------------------------------------------------------------------------------------------------------------------------------------------------------------------------------------------------------------------------------------------------------------------------------------------------------------------------------------------------------------------------------------------------------------------------------------------------------------------|-----------------------------------------------------------------------------------------------------------------------------------------------------------------------------------------------------------------------------------------------------------------------------------------------------------------------------------------------------------------------------------------------------------------------------------------------------------------------------------------------------------------------------------------------------------------------------------------------------------------------------------------------------------------------------------------------------------------------------------------------------------------------------------------------------------------------------------------------------------------------------------------------------------------------------------------------------------------------------------------------|
|                                          | <div data-bbox="168 204 600 427">  Israel Foreign Min.  @IsraelMFA <span>Following</span> <p>This morning, IDF forces thwarted an attack by Hamas terrorists attempting to infiltrate Israel via a <b>#terror</b> tunnel <a href="http://bit.ly/1nzAbi8">bit.ly/1nzAbi8</a></p> <p>8:58 pm - 17 Jul 2014</p> <p>25 Retweets 8 Likes</p> </div> <div data-bbox="168 459 600 683">  Israel Foreign Min.  @IsraelMFA <span>Following</span> <p><b>#Hamas</b> positions rocket launching sites, weapons caches, &amp; command centers in areas surrounded by civilian buildings <a href="http://bit.ly/1m6HvBs">bit.ly/1m6HvBs</a></p> <p>9:26 pm - 17 Jul 2014</p> <p>23 Retweets 10 Likes</p> </div> | <div data-bbox="638 204 1115 443">  Israel Foreign Min.  @IsraelMFA <span>Following</span> <p>Partners in <b>#terror</b>: Expressions of support in the <b>#Gaza</b> Strip for the Islamic State in Iraq and Al-Sham (<b>#ISIS</b>) <a href="http://bit.ly/Ue2nR0">bit.ly/Ue2nR0</a></p> <p>10:32 pm - 17 Jul 2014</p> <p>32 Retweets 8 Likes</p> </div> <div data-bbox="638 475 1115 746">  Israel Foreign Min.  @IsraelMFA <span>Following</span> <p>In light of Hamas' criminal aggression &amp; the dangerous attempt to infiltrate Israeli territory, Israel must act to defend its citizens. <b>#Gaza</b></p> <p>12:05 am - 18 Jul 2014</p> <p>46 Retweets 24 Likes</p> </div> | <div data-bbox="1187 204 1641 531">  Israel Foreign Min.  @IsraelMFA <span>Following</span> <p>While Israel protects civilians from rockets Hamas uses civilians to protect their rockets.</p> <div data-bbox="1187 316 1641 419">  Meanwhile in the Middle East<br/>While Israel protects civilians from rockets Hamas uses civilians to protect their rockets. <a href="http://www.facebook.com/IsraelUnderFireLive">www.facebook.com/IsraelUnderFireLive</a><br/>Twitter: @IsraelUnderFire We...<br/><a href="http://youtube.com">youtube.com</a> </div> <p>4:15 pm - 17 Jul 2014</p> <p>43 Retweets 16 Likes</p> </div> <div data-bbox="1187 587 1641 922">  Israel Foreign Min.  @IsraelMFA <span>Following</span> <p>Although the IDF held its fire, a rocket fired from <b>#Gaza</b> during the humanitarian window fell in Israel this afternoon</p>  </div> | <div data-bbox="1724 204 2123 403">  Israel Foreign Min.  @IsraelMFA <span>Following</span> <p>IDF begins ground operation in <b>#Gaza</b>, targeting Hamas' <b>#terror</b> tunnels that enable terrorists to infiltrate Israel &amp; carry out attacks.</p> <p>11:01 pm - 17 Jul 2014</p> <p>108 Retweets 36 Likes</p> </div> <div data-bbox="1724 451 2123 675">  Israel Foreign Min.  @IsraelMFA <span>Following</span> <p>Decision for ground action came after Israel accepted Egyptian cease-fire proposal &amp; its rejection by Hamas which continued firing rockets</p> <p>11:50 pm - 17 Jul 2014</p> <p>94 Retweets 31 Likes</p> </div> |
| 18 <sup>th</sup> – 19 <sup>th</sup> July | Hamas attacks from the sky with rockets and from below with tunnels.                                                                                                                                                                                                                                                                                                                                                                                                                                                                                                                                                                                                                                                                                                                                                                                                                                                                                                                                                                   | Hamas's main objective is to destroy Israel and kill Jews.                                                                                                                                                                                                                                                                                                                                                                                                                                                                                                                                                                                                                                                                                                                                                                                                                                                                                                                                                               | Hamas is using tunnels to massacre Israelis and firing rockets from civilian areas.                                                                                                                                                                                                                                                                                                                                                                                                                                                                                                                                                                                                                                                                                                                                                                                                                                                                                                                                                                                                                                                                                                                                                                                                                                                                                                    | A ground operation because the air force alone cannot destroy tunnels                                                                                                                                                                                                                                                                                                                                                                                                                                                                                                                                                                                                                                                                                                                                                                                                                                                                                                                         |

|  |                                                                                                                                                                                                                                                                                                                                                                                                                                                                                                                                                                                                                                                                                                                                                                                                        |
|--|--------------------------------------------------------------------------------------------------------------------------------------------------------------------------------------------------------------------------------------------------------------------------------------------------------------------------------------------------------------------------------------------------------------------------------------------------------------------------------------------------------------------------------------------------------------------------------------------------------------------------------------------------------------------------------------------------------------------------------------------------------------------------------------------------------|
|  | <div data-bbox="174 204 600 539">  <b>Israel Foreign Min.</b> <span>✓</span><br/> @IsraelMFA <span>Following</span> </div> <p>The tunnels # Hamas digs underground are used by it to infiltrate into Israel in order to commit acts of #terrorism</p> <div data-bbox="174 335 600 430">  <div data-bbox="280 343 600 406"> <b>Hamas underground tunnels for terror</b><br/> The tunnels Hamas digs underground are used for infiltration into Israel in order to commit terrorism acts against civilians.<br/> youtube.com </div> </div> <p>11:35 am · 18 Jul 2014</p> <div data-bbox="174 478 600 539"> 39 Retweets 11 Likes </div> |
|--|--------------------------------------------------------------------------------------------------------------------------------------------------------------------------------------------------------------------------------------------------------------------------------------------------------------------------------------------------------------------------------------------------------------------------------------------------------------------------------------------------------------------------------------------------------------------------------------------------------------------------------------------------------------------------------------------------------------------------------------------------------------------------------------------------------|

|                                          |                                                                                                                                                                                                                                                                                                                                                                                                                                                                                                                                                                                                                                                                                                                                        |                                                                                                                                                                                                                                                                                                                                                                                                                                                                                                                                                                                                                                                                                                                                                                    |                                                                                                                                                                                                                                                                                                                                                                                                                                                                                                                                                                                                                                                                                                                                              |                                                                                                                                                                                                                                                                                                                                                                                                                                                                                                                                                                                                                                                                                                                                                                                                                                                                    |
|------------------------------------------|----------------------------------------------------------------------------------------------------------------------------------------------------------------------------------------------------------------------------------------------------------------------------------------------------------------------------------------------------------------------------------------------------------------------------------------------------------------------------------------------------------------------------------------------------------------------------------------------------------------------------------------------------------------------------------------------------------------------------------------|--------------------------------------------------------------------------------------------------------------------------------------------------------------------------------------------------------------------------------------------------------------------------------------------------------------------------------------------------------------------------------------------------------------------------------------------------------------------------------------------------------------------------------------------------------------------------------------------------------------------------------------------------------------------------------------------------------------------------------------------------------------------|----------------------------------------------------------------------------------------------------------------------------------------------------------------------------------------------------------------------------------------------------------------------------------------------------------------------------------------------------------------------------------------------------------------------------------------------------------------------------------------------------------------------------------------------------------------------------------------------------------------------------------------------------------------------------------------------------------------------------------------------|--------------------------------------------------------------------------------------------------------------------------------------------------------------------------------------------------------------------------------------------------------------------------------------------------------------------------------------------------------------------------------------------------------------------------------------------------------------------------------------------------------------------------------------------------------------------------------------------------------------------------------------------------------------------------------------------------------------------------------------------------------------------------------------------------------------------------------------------------------------------|
| Example Tweets                           |  Israel Foreign Min.  @IsraelMFA <span>Following</span><br>While the IDF does all it can to avoid civilian casualties, Hamas deliberately puts lives of #Gaza civilians in danger<br> Hamas: We Place Civilians in the Line of Fire<br>While the IDF does everything that it can to avoid civilian casualties, Hamas deliberately puts Palestinian civilian lives in danger. Hamas hides weapons and...<br>youtube.com<br>3:38 pm · 20 Jul 2014<br>35 Retweets 17 Likes<br>12 35 17 |  Israel Foreign Min.  @IsraelMFA <span>Following</span><br>Hamas uses teens in #Gaza as human shields:   Hamas: We Will Give Hand -Grenades to Our Youth<br>youtube.com/watch?v=I_UbLH ...<br>#IsraelUnderFire<br> Hamas: We Will Give Hand -Grenades to Our Youth<br>Hamas' Spokesman, aired on Al-Aqsa TV, July 18, 2014, 22:30: Our military industry manufactured 250,000 hand-grenades which we will give to our youth in orde...<br>youtube.com<br>9:40 am · 20 Jul 2014<br>61 Retweets 5 Likes<br>8 61 5 |  Israel Foreign Min.  @IsraelMFA <span>Following</span><br>While the IDF does all it can to avoid civilian casualties, Hamas deliberately puts lives of #Gaza civilians in danger<br> Hamas: We Place Civilians in the Line of Fire<br>While the IDF does everything that it can to avoid civilian casualties, Hamas deliberately puts Palestinian civilian lives in danger. Hamas hides weapons and...<br>youtube.com<br>3:38 pm · 20 Jul 2014<br>35 Retweets 17 Likes<br>12 35 17 |  Israel Foreign Min.  @IsraelMFA <span>Following</span><br>IDF will establish a field hospital at Erez Crossing today to supply #medical assistance & humanitarian care to Palestinians from #Gaza.<br>1:19 pm · 20 Jul 2014<br>40 Retweets 15 Likes<br>16 40 15<br> Israel Foreign Min.  @IsraelMFA <span>Following</span><br>The IDF has authorized a #humanitarian window to evacuate injured Palestinians from Shuja'iyya in #Gaza between 13:30-15:30<br>1:59 pm · 20 Jul 2014<br>28 Retweets 12 Likes<br>4 28 12 |
| 23 <sup>rd</sup> July                    | The Un condemns Israel but not Hamas.                                                                                                                                                                                                                                                                                                                                                                                                                                                                                                                                                                                                                                                                                                  | International double standards.                                                                                                                                                                                                                                                                                                                                                                                                                                                                                                                                                                                                                                                                                                                                    | Israel condemns terror.                                                                                                                                                                                                                                                                                                                                                                                                                                                                                                                                                                                                                                                                                                                      | Israel rejects UNHRC decision                                                                                                                                                                                                                                                                                                                                                                                                                                                                                                                                                                                                                                                                                                                                                                                                                                      |
| Example Tweets                           |  Israel Foreign Min.  @IsraelMFA <span>Following</span><br>Amb Manor: Hamas is committing #WarCrimes when it fires rockets from #Gaza indiscriminately at Israeli towns.<br>bit.ly/1sQRhAe<br>4:12 pm · 23 Jul 2014<br>28 Retweets 14 Likes<br>12 28 14                                                                                                                                                                                                                                                                                                              |  Israel Foreign Min.  @IsraelMFA <span>Following</span><br>FM Liberman: Once uncovered, @UNRWA returned the rockets to Hamas instead of handing them over to Israel.<br>bit.ly/WEIqP #Gaza<br>1:01 am · 24 Jul 2014<br>46 Retweets 11 Likes<br>7 46 11                                                                                                                                                                                                                                                                                                                                           |  Israel Foreign Min.  @IsraelMFA <span>Following</span><br>President Peres: I call upon the #HumanRights Council to condemn terrorism, especially of Hamas. bit.ly/WEjrKI #Gaza<br>1:42 am · 24 Jul 2014<br>57 Retweets 28 Likes<br>16 57 28                                                                                                                                                                                                                                                                                                                           |  Israel Foreign Min.  @IsraelMFA <span>Following</span><br>#UNHRC decision should be rejected by decent people everywhere bit.ly/WEVIqO #Gaza #Terror<br>12:20 am · 24 Jul 2014<br>47 Retweets 26 Likes<br>8 47 26                                                                                                                                                                                                                                                                                                                                                                                                                                                                           |
| 24 <sup>th</sup> - 26 <sup>th</sup> July | Hamas Rockets threaten 6 million Israelis all across Israel.                                                                                                                                                                                                                                                                                                                                                                                                                                                                                                                                                                                                                                                                           | Hamas is a terror organisation.                                                                                                                                                                                                                                                                                                                                                                                                                                                                                                                                                                                                                                                                                                                                    | Hamas uses people as human shields whilst Israel provides aid and avoids civilian casualties.                                                                                                                                                                                                                                                                                                                                                                                                                                                                                                                                                                                                                                                | Military operation, disarming Hamas, and a new government in Gaza.                                                                                                                                                                                                                                                                                                                                                                                                                                                                                                                                                                                                                                                                                                                                                                                                 |

|                                         |                                                                                   |                                                                                    |                                                                                                                                                                         |                                                                                                                                                                                                                                                             |
|-----------------------------------------|-----------------------------------------------------------------------------------|------------------------------------------------------------------------------------|-------------------------------------------------------------------------------------------------------------------------------------------------------------------------|-------------------------------------------------------------------------------------------------------------------------------------------------------------------------------------------------------------------------------------------------------------|
|                                         |  |  |   |    |
| 27 <sup>th</sup> -29 <sup>th</sup> July | Hamas endangers the lives of Palestinians.                                        | Hamas are radical fundamentalists.                                                 | Hamas spends aid money on terror and uses Gazans as human shields whilst Israel provides aid and avoids civilian casualties                                             | Save the Palestinians from Hamas and demilitarize Gaza.                                                                                                                                                                                                     |



|                                                |                                                                                                                                                                                                                                                                                                                                                                                                                                                                                                                                                                                                                                                                                                                                                                                                     |                                                                                                                                                                                                                                                                                                                                                                                                                                                                                                                                                                                                                                                                                                                                                                                                                                                                                                                                                                                                                                                                                                                          |                                                                                                                                                                                                                                                                                                                                                                                                                                                                                                                                                                                                                                                                                                                                                                                                                                                                                                                                                                                                                                                                                                                                                                                                                                                                                                                                                                                                                                                                                                                                                                                                                                                                                                                                                                                                       |                                                                                                                                                                                                                                                                                                                                                                                                                                                                                                                                                                                                                                                                                                                                                                                                                                                                                                                                                                                                                                                                                                                                                                                                                                                                                                                                 |
|------------------------------------------------|-----------------------------------------------------------------------------------------------------------------------------------------------------------------------------------------------------------------------------------------------------------------------------------------------------------------------------------------------------------------------------------------------------------------------------------------------------------------------------------------------------------------------------------------------------------------------------------------------------------------------------------------------------------------------------------------------------------------------------------------------------------------------------------------------------|--------------------------------------------------------------------------------------------------------------------------------------------------------------------------------------------------------------------------------------------------------------------------------------------------------------------------------------------------------------------------------------------------------------------------------------------------------------------------------------------------------------------------------------------------------------------------------------------------------------------------------------------------------------------------------------------------------------------------------------------------------------------------------------------------------------------------------------------------------------------------------------------------------------------------------------------------------------------------------------------------------------------------------------------------------------------------------------------------------------------------|-------------------------------------------------------------------------------------------------------------------------------------------------------------------------------------------------------------------------------------------------------------------------------------------------------------------------------------------------------------------------------------------------------------------------------------------------------------------------------------------------------------------------------------------------------------------------------------------------------------------------------------------------------------------------------------------------------------------------------------------------------------------------------------------------------------------------------------------------------------------------------------------------------------------------------------------------------------------------------------------------------------------------------------------------------------------------------------------------------------------------------------------------------------------------------------------------------------------------------------------------------------------------------------------------------------------------------------------------------------------------------------------------------------------------------------------------------------------------------------------------------------------------------------------------------------------------------------------------------------------------------------------------------------------------------------------------------------------------------------------------------------------------------------------------------|---------------------------------------------------------------------------------------------------------------------------------------------------------------------------------------------------------------------------------------------------------------------------------------------------------------------------------------------------------------------------------------------------------------------------------------------------------------------------------------------------------------------------------------------------------------------------------------------------------------------------------------------------------------------------------------------------------------------------------------------------------------------------------------------------------------------------------------------------------------------------------------------------------------------------------------------------------------------------------------------------------------------------------------------------------------------------------------------------------------------------------------------------------------------------------------------------------------------------------------------------------------------------------------------------------------------------------|
|                                                | <div data-bbox="174 193 600 526">  <b>Israel Foreign Min.</b> <span>@IsraelMFA</span> <span>Following</span> <p>Hamas human shields are to blame, not Israel - @COLRICHARDKEMP thetim.es/1nZEu6S via @TheTimes #Gaza #IsraelUnderFire</p> <div data-bbox="174 327 600 422">  <p>Hamas human shields are to blame, not Israel<br/>"The Israelis are doing it all wrong. The RAF didn't fly off to bomb Belfast in the troubles." These words from a respected media commentator embody the extraordinary lack of understanding by...<br/>thetimes.co.uk</p> </div> <p>3:09 am · 27 Jul 2014</p> <p>57 Retweets 24 Likes</p> </div> | <div data-bbox="638 193 1108 526">  <b>Israel Foreign Min.</b> <span>@IsraelMFA</span> <span>Following</span> <p>Hamas - a #terror organization that sacrifices the lives of the people of #Gaza.</p> <div data-bbox="638 327 1108 438">  <p>Hamas' favorite spots: schools, hospitals &amp; cemeteries<br/>http://bit.ly/1AbvFk7 Where does Hamas like to operate? Where do its terrorists place their firing positions and rocket launchers? In places normal people ho...<br/>youtube.com</p> </div> <p>12:01 pm · 28 Jul 2014</p> <p>43 Retweets 21 Likes</p> </div> <div data-bbox="638 574 1108 821">  <b>Israel Foreign Min.</b> <span>@IsraelMFA</span> <span>Following</span> <p>Hamas part of global Islamic #terrorism, which poses a threat to #security worldwide<br/>bit.ly/1k3wK8w</p> <p>3:02 pm · 28 Jul 2014</p> <p>42 Retweets 19 Likes</p> </div> | <div data-bbox="1193 193 1641 454">  <b>Israel Foreign Min.</b> <span>@IsraelMFA</span> <span>Following</span> <p>The humanitarian window was agreed upon for the #welfare of #Gaza's civilians, but Hamas AGAIN chose #terror over the welfare of its own ppl</p> <p>1:06 pm · 27 Jul 2014</p> <p>63 Retweets 17 Likes</p> </div> <div data-bbox="1193 486 1641 821">  <b>Israel Foreign Min.</b> <span>@IsraelMFA</span> <span>Following</span> <p>WATCH: Hamas terrorists are seen shooting three rockets at Israel from within a #school in #Gaza</p> <div data-bbox="1193 622 1641 726">  <p>Hamas Terrorists Fire Rockets from a Gazan School<br/>Hamas terrorists are seen shooting three rockets at Israel from within a school in Gaza. Hamas has consistently used schools and other public buildings as ro...<br/>youtube.com</p> </div> <p>6:04 pm · 27 Jul 2014</p> <p>77 Retweets 30 Likes</p> </div> <div data-bbox="1193 853 1641 1204">  <b>Israel Foreign Min.</b> <span>@IsraelMFA</span> <span>Following</span> <p>Instead of investing money in the #children of #Gaza, Hamas builds terror tunnels and buys more weapons.</p> <div data-bbox="1193 989 1641 1093">  <p>SAVE THE CHILDREN OF GAZA FROM HAMAS<br/>SAVE THE CHILDREN OF GAZA FROM HAMAS<br/>youtube.com</p> </div> <p>8:56 pm · 27 Jul 2014</p> <p>70 Retweets 16 Likes</p> </div> | <div data-bbox="1740 193 2188 590">  <b>Israel Foreign Min.</b> <span>@IsraelMFA</span> <span>Following</span> <p>Hamas threatening journalists in #Gaza who expose abuse of civilians<br/>toi.sr/1rqJqFI via @timesofisrael #FreeGazaFromHamas</p> <div data-bbox="1740 327 2188 526">  <p>Hamas threatening journalists in Gaza who expose abuse of civilians<br/>Reporters are bullied, have equipment confiscated, barred from sensitive sites... but they don't report it. 'They're too scared,' says Israeli official, lamenting capitulation t...<br/>timesofisrael.com</p> </div> </div> <div data-bbox="1740 606 2188 957">  <b>Israel Foreign Min.</b> <span>@IsraelMFA</span> <span>Following</span> <p>Instead of investing money in the #children of #Gaza, Hamas builds terror tunnels and buys more weapons.</p> <div data-bbox="1740 726 2188 957">  <p>SAVE THE CHILDREN OF GAZA FROM HAMAS</p> <p>MORE VIDEOS</p> <p>0:09 / 1:21</p> <p>YouTube</p> </div> </div> |
| 30 <sup>th</sup> July – 5 <sup>th</sup> August | Hamas violates ceasefire                                                                                                                                                                                                                                                                                                                                                                                                                                                                                                                                                                                                                                                                                                                                                                            | Hamas are radical fundamentalists.                                                                                                                                                                                                                                                                                                                                                                                                                                                                                                                                                                                                                                                                                                                                                                                                                                                                                                                                                                                                                                                                                       | Hamas is barbaric.                                                                                                                                                                                                                                                                                                                                                                                                                                                                                                                                                                                                                                                                                                                                                                                                                                                                                                                                                                                                                                                                                                                                                                                                                                                                                                                                                                                                                                                                                                                                                                                                                                                                                                                                                                                    | Ceasefire, demilitarize Gaza with the support of other states.                                                                                                                                                                                                                                                                                                                                                                                                                                                                                                                                                                                                                                                                                                                                                                                                                                                                                                                                                                                                                                                                                                                                                                                                                                                                  |

|                                           |                                                                                                                                                                                                                                                                                                                                                                                                                                                                                                                                                                                                                                                                                                                                                                                                                                                                                                                                                                                                                                                                                                                                                                                                                                                                                                                                                                                                                                                                                                                                                                                                                             |                                                                                                                                                                                                                                                                                                                                                                                                                                                                                                                                                                                                                                                                                                                                                                                                                                                                                                                                                                                                                                                                                                                                                                                                                                                                                                                                                                                                                                                                                                                                                                                         |                                                                                                                                                                                                                                                                                                                                                                                                                                                                                                                                                                                                                                                                                                                                                                                                                                                                                                                                                                                                                                                                                                                                                                                                                                                                                                                                                                                                                                                                                                                                                                                                              |                                                                                                                                                                                                                                                                                                                                                                                                                                                                                                                                                                                                                                                                                                                                                                                                                                                                                                                                                                                                                                                                                                                                                                                                                                                                                                                                                                                                                                                                                                                                                                                                                                                                                        |
|-------------------------------------------|-----------------------------------------------------------------------------------------------------------------------------------------------------------------------------------------------------------------------------------------------------------------------------------------------------------------------------------------------------------------------------------------------------------------------------------------------------------------------------------------------------------------------------------------------------------------------------------------------------------------------------------------------------------------------------------------------------------------------------------------------------------------------------------------------------------------------------------------------------------------------------------------------------------------------------------------------------------------------------------------------------------------------------------------------------------------------------------------------------------------------------------------------------------------------------------------------------------------------------------------------------------------------------------------------------------------------------------------------------------------------------------------------------------------------------------------------------------------------------------------------------------------------------------------------------------------------------------------------------------------------------|-----------------------------------------------------------------------------------------------------------------------------------------------------------------------------------------------------------------------------------------------------------------------------------------------------------------------------------------------------------------------------------------------------------------------------------------------------------------------------------------------------------------------------------------------------------------------------------------------------------------------------------------------------------------------------------------------------------------------------------------------------------------------------------------------------------------------------------------------------------------------------------------------------------------------------------------------------------------------------------------------------------------------------------------------------------------------------------------------------------------------------------------------------------------------------------------------------------------------------------------------------------------------------------------------------------------------------------------------------------------------------------------------------------------------------------------------------------------------------------------------------------------------------------------------------------------------------------------|--------------------------------------------------------------------------------------------------------------------------------------------------------------------------------------------------------------------------------------------------------------------------------------------------------------------------------------------------------------------------------------------------------------------------------------------------------------------------------------------------------------------------------------------------------------------------------------------------------------------------------------------------------------------------------------------------------------------------------------------------------------------------------------------------------------------------------------------------------------------------------------------------------------------------------------------------------------------------------------------------------------------------------------------------------------------------------------------------------------------------------------------------------------------------------------------------------------------------------------------------------------------------------------------------------------------------------------------------------------------------------------------------------------------------------------------------------------------------------------------------------------------------------------------------------------------------------------------------------------|----------------------------------------------------------------------------------------------------------------------------------------------------------------------------------------------------------------------------------------------------------------------------------------------------------------------------------------------------------------------------------------------------------------------------------------------------------------------------------------------------------------------------------------------------------------------------------------------------------------------------------------------------------------------------------------------------------------------------------------------------------------------------------------------------------------------------------------------------------------------------------------------------------------------------------------------------------------------------------------------------------------------------------------------------------------------------------------------------------------------------------------------------------------------------------------------------------------------------------------------------------------------------------------------------------------------------------------------------------------------------------------------------------------------------------------------------------------------------------------------------------------------------------------------------------------------------------------------------------------------------------------------------------------------------------------|
|                                           | <div>  Israel Foreign Min.  @IsraelMFA <span>Following</span> </div> <p>Since it's hard to keep up with Hamas' ceasefire violations - here's a <a href="#">#chronology</a> of them. <a href="http://bit.ly/1u3hLMI">bit.ly/1u3hLMI</a> #Gaza</p> <p>6:26 pm - 31 Jul 2014</p> <p>63 Retweets 26 Likes</p> <div>  19  63  26  </div> <div>  Israel Foreign Min.  @IsraelMFA <span>Following</span> </div> <p>Hamas violated the humanitarian ceasefire which began this morning by firing rockets at Israel from #Gaza.</p> <p>12:17 pm - 1 Aug 2014</p> <p>158 Retweets 24 Likes</p> <div>  31  158  24  </div> | <div>  Israel Foreign Min.  @IsraelMFA <span>Following</span> </div> <p>Hamas has turned #Gaza into a terrorist fortress, both above and below ground. <a href="http://bit.ly/1jPd20v">bit.ly/1jPd20v</a></p> <p>1:50 pm - 31 Jul 2014</p> <p>43 Retweets 21 Likes</p> <div>  16  43  21  </div> <div>  Israel Foreign Min.  @IsraelMFA <span>Following</span> </div> <p>Hamas official, Ismail Radwan, praises Palestinians in #Gaza for sacrificing woman, #children &amp; elderly.</p> <p>8:20 am - 3 Aug 2014</p> <p>96 Retweets 27 Likes</p> <div>  15  96  27  </div> | <div>  Israel Foreign Min.  @IsraelMFA <span>Following</span> </div> <p>Tunnels Lead Right to the Heart of Israeli <a href="http://nyti.ms/1PEHtv">#Fear nyti.ms/1PEHtv</a> via @nytimes #Gaza</p> <p>7:50 am - 30 Jul 2014</p> <p>47 Retweets 10 Likes</p> <div>  11  47  10  </div> <div>  Israel Foreign Min.  @IsraelMFA <span>Following</span> </div> <p>The @WhiteHouse Press Secretary Josh Earnest: The attack on Israel is a barbaric violation of the #Gaza cease-fire.</p> <p>12:48 pm - 31 Jul 2014</p> <p>37 Retweets 14 Likes</p> <div>  4  37  14  </div> | <div>  Israel Foreign Min.  @IsraelMFA <span>Following</span> </div> <p>Arab Leaders, Viewing Hamas as Worse Than Israel, Stay Silent <a href="http://nyti.ms/1o540vU">nyti.ms/1o540vU</a> #Gaza #GazaUnderAttack</p> <p>12:48 pm - 31 Jul 2014</p> <p>37 Retweets 14 Likes</p> <div>  4  37  14  </div> <div>  Israel Foreign Min.  @IsraelMFA <span>Following</span> </div> <p>PM Netanyahu: US &amp; European support of the need to demilitarize terrorist orgs is an important achievement for Israel <a href="http://bit.ly/1p1ujjj">bit.ly/1p1ujjj</a></p> <p>9:26 am - 3 Aug 2014</p> <p>44 Retweets 13 Likes</p> <div>  9  44  13  </div> |
| 6 <sup>th</sup> – 7 <sup>th</sup> August  | Hamas is committed to radical Islam and terror.                                                                                                                                                                                                                                                                                                                                                                                                                                                                                                                                                                                                                                                                                                                                                                                                                                                                                                                                                                                                                                                                                                                                                                                                                                                                                                                                                                                                                                                                                                                                                                             | Global Islamic extremism.                                                                                                                                                                                                                                                                                                                                                                                                                                                                                                                                                                                                                                                                                                                                                                                                                                                                                                                                                                                                                                                                                                                                                                                                                                                                                                                                                                                                                                                                                                                                                               | Israel is at the forefront of the struggle between democracy and radicalism.                                                                                                                                                                                                                                                                                                                                                                                                                                                                                                                                                                                                                                                                                                                                                                                                                                                                                                                                                                                                                                                                                                                                                                                                                                                                                                                                                                                                                                                                                                                                 | Ceasefire that Israel has agreed to.                                                                                                                                                                                                                                                                                                                                                                                                                                                                                                                                                                                                                                                                                                                                                                                                                                                                                                                                                                                                                                                                                                                                                                                                                                                                                                                                                                                                                                                                                                                                                                                                                                                   |
|                                           | <div>  Israel Foreign Min.  @IsraelMFA <span>Following</span> </div> <p>.@IsraelinUN's Amb. Prosor: Israel is on the #Frontline of the War Against Radical #Extremism</p> <p>12:17 am - 8 Aug 2014</p> <p>24 Retweets 11 Likes</p> <div>  6  24  11  </div>                                                                                                                                                                                                                                                                                                                                                                                                                                                                                                                                                                                                                                                                                                                                                                                                                                                   | <div>  Israel Foreign Min.  @IsraelMFA <span>Following</span> </div> <p>Hamas &amp; the terror orgs in #Gaza demonstrate yet again that they are committed to terror &amp; violence over any attempt to resolve the conflict</p> <p>11:20 am - 8 Aug 2014</p> <p>52 Retweets 13 Likes</p> <div>  16  52  13  </div>                                                                                                                                                                                                                                                                                                                                                                                                                                                                                                                                                                                                                                                                                                                                                       | <div>  Israel Foreign Min.  @IsraelMFA <span>Following</span> </div> <p>.@IsraelinUN's Amb. Prosor: Israel is on the #Frontline of the War Against Radical #Extremism</p> <p>12:17 am - 8 Aug 2014</p> <p>24 Retweets 11 Likes</p> <div>  6  24  11  </div>                                                                                                                                                                                                                                                                                                                                                                                                                                                                                                                                                                                                                                                                                                                                                                                                                        | <div>  Israel Foreign Min.  @IsraelMFA <span>Following</span> </div> <p>The 72-hour ceasefire between Israel &amp; Hamas is holding as it enters its second day. All IDF forces are out of #Gaza. <a href="http://bit.ly/1xzy310">bit.ly/1xzy310</a></p> <p>12:33 pm - 6 Aug 2014</p> <p>33 Retweets 15 Likes</p> <div>  3  33  15  </div>                                                                                                                                                                                                                                                                                                                                                                                                                                                                                                                                                                                                                                                                                                                                                                                                                   |
| 8 <sup>th</sup> - 14 <sup>th</sup> August | Hamas violates ceasefire.                                                                                                                                                                                                                                                                                                                                                                                                                                                                                                                                                                                                                                                                                                                                                                                                                                                                                                                                                                                                                                                                                                                                                                                                                                                                                                                                                                                                                                                                                                                                                                                                   | Hamas is addicted to terror and uses Gazans as human shields.                                                                                                                                                                                                                                                                                                                                                                                                                                                                                                                                                                                                                                                                                                                                                                                                                                                                                                                                                                                                                                                                                                                                                                                                                                                                                                                                                                                                                                                                                                                           | Hamas uses Gazans as human shields.                                                                                                                                                                                                                                                                                                                                                                                                                                                                                                                                                                                                                                                                                                                                                                                                                                                                                                                                                                                                                                                                                                                                                                                                                                                                                                                                                                                                                                                                                                                                                                          | Ceasefire, eliminate Hamas and demilitarize Gaza.                                                                                                                                                                                                                                                                                                                                                                                                                                                                                                                                                                                                                                                                                                                                                                                                                                                                                                                                                                                                                                                                                                                                                                                                                                                                                                                                                                                                                                                                                                                                                                                                                                      |



|                                            |                                                                                                                                                                                                                                                                                                                                                                                                                                                                                                                                                                                                        |                                                                                                                                                                                                                                                                                                                                                                                                                                                                                                                                                                                                             |                                                                                                                                                                                                                                                                                                                                                                                                                                                                                                                                                                                                                                          |                                                                                                                                                                                                                                                                                                                                                                                                                                                                                                                                                                                                                                               |
|--------------------------------------------|--------------------------------------------------------------------------------------------------------------------------------------------------------------------------------------------------------------------------------------------------------------------------------------------------------------------------------------------------------------------------------------------------------------------------------------------------------------------------------------------------------------------------------------------------------------------------------------------------------|-------------------------------------------------------------------------------------------------------------------------------------------------------------------------------------------------------------------------------------------------------------------------------------------------------------------------------------------------------------------------------------------------------------------------------------------------------------------------------------------------------------------------------------------------------------------------------------------------------------|------------------------------------------------------------------------------------------------------------------------------------------------------------------------------------------------------------------------------------------------------------------------------------------------------------------------------------------------------------------------------------------------------------------------------------------------------------------------------------------------------------------------------------------------------------------------------------------------------------------------------------------|-----------------------------------------------------------------------------------------------------------------------------------------------------------------------------------------------------------------------------------------------------------------------------------------------------------------------------------------------------------------------------------------------------------------------------------------------------------------------------------------------------------------------------------------------------------------------------------------------------------------------------------------------|
|                                            |  Israel Foreign Min.  @IsraelMFA <span>Following</span><br>This morning, with the ceasefire still in effect, rockets were fired at Israel from #Gaza by terrorists.<br>                                                                                                                                                                             |  Israel Foreign Min.  @IsraelMFA <span>Following</span><br>Hamas is addicted to terror & is responsible for taking the lives of civilians in #Gaza & Israel. #FreeGazaFromHamas<br>                                                                                                                                                                     |  Israel Foreign Min.  @IsraelMFA <span>Following</span><br>Opinion: Hamas needs the Palestinians' deaths in order to claim victory <a href="http://bit.ly/1uaqP53">bit.ly/1uaqP53</a> via @i24news_EN #Gaza<br>5:32 pm - 9 Aug 2014<br>38 Retweets 19 Likes<br><br>                          |  Israel Foreign Min.  @IsraelMFA <span>Following</span><br>#Gaza's demilitarization is important both for Israel and for the residents of Gaza and their future safety & prosperity.<br>11:56 pm - 14 Aug 2014<br>57 Retweets 40 Likes<br><br>                                                    |
| 15 <sup>th</sup> - 18 <sup>th</sup> August | Hamas violates ceasefire.                                                                                                                                                                                                                                                                                                                                                                                                                                                                                                                                                                              | Hamas is addicted to terror                                                                                                                                                                                                                                                                                                                                                                                                                                                                                                                                                                                 | Israel helps wounded Gazans                                                                                                                                                                                                                                                                                                                                                                                                                                                                                                                                                                                                              | Ceasefire.                                                                                                                                                                                                                                                                                                                                                                                                                                                                                                                                                                                                                                    |
|                                            |  Israel Foreign Min.  @IsraelMFA <span>Following</span><br>Israel will continue its efforts to transfer humanitarian aid into #Gaza, provided the border crossings are not attacked by Hamas rockets<br>10:16 am - 15 Aug 2014<br>34 Retweets 12 Likes<br><br> |  Israel Foreign Min.  @IsraelMFA <span>Following</span><br>Hamas has much in common with #ISIS, #AlQuaeda & Boko Haram. They're all part of the challenge posed to the democratic world, including Israel<br>12:00 pm - 15 Aug 2014<br>91 Retweets 44 Likes<br><br> |  Israel Foreign Min.  @IsraelMFA <span>Following</span><br>Israel continuously works to transfer the ill & the wounded from #Gaza for medical treatment in Israel & abroad. <a href="http://bit.ly/1rbOTUZ">bit.ly/1rbOTUZ</a><br>11:05 am - 15 Aug 2014<br>43 Retweets 20 Likes<br><br> |  Israel Foreign Min.  @IsraelMFA <span>Following</span><br>Israel, like the EU FAC attributes great importance to the Egyptian initiative to achieve a stable, durable ceasefire. <a href="http://bit.ly/1taD3aq">bit.ly/1taD3aq</a><br>12:15 pm - 17 Aug 2014<br>15 Retweets 6 Likes<br><br> |

|                                            |                                                                                                                                                                                                                                                                                                                                                                                                                                                                                                                                                                                                                                                                                                                                            |                                                                                                                                                                                                                                                                                                                                                                                                                                                                                                                                                                                                                                                                                                                               |                                                                                                                                                                                                                                                                                                                                                                                                                                                                                                                                                                                                                                                    |                                                                                                                                                                                                                                                                                                                                                                                     |
|--------------------------------------------|--------------------------------------------------------------------------------------------------------------------------------------------------------------------------------------------------------------------------------------------------------------------------------------------------------------------------------------------------------------------------------------------------------------------------------------------------------------------------------------------------------------------------------------------------------------------------------------------------------------------------------------------------------------------------------------------------------------------------------------------|-------------------------------------------------------------------------------------------------------------------------------------------------------------------------------------------------------------------------------------------------------------------------------------------------------------------------------------------------------------------------------------------------------------------------------------------------------------------------------------------------------------------------------------------------------------------------------------------------------------------------------------------------------------------------------------------------------------------------------|----------------------------------------------------------------------------------------------------------------------------------------------------------------------------------------------------------------------------------------------------------------------------------------------------------------------------------------------------------------------------------------------------------------------------------------------------------------------------------------------------------------------------------------------------------------------------------------------------------------------------------------------------|-------------------------------------------------------------------------------------------------------------------------------------------------------------------------------------------------------------------------------------------------------------------------------------------------------------------------------------------------------------------------------------|
|                                            |                                                                                                                                                                                                                                                                                                                                                                                                                                                                                                                                                                                                                                                                                                                                            |  <b>Israel Foreign Min.</b> <span>✓</span><br>@IsraelMFA <span>Following</span> <p>Hamas, a terrorist organization that is addicted to terror and committed to violence and destruction. <a href="https://youtu.be/Jgn2JPYSmaU">youtu.be/Jgn2JPYSmaU</a> #Gaza</p>  <b>Meet Hamas - short information video</b><br>Meet Hamas is a short animated video, Directed and designed by Bretter Studio, which is aiming to shed light over the complicated situation in the Gaza Strip...<br>youtube.com <p>5:22 pm - 17 Aug 2014</p> <p>48 Retweets 27 Likes</p> |                                                                                                                                                                                                                                                                                                                                                                                                                                                                                                                                                                                                                                                    |                                                                                                                                                                                                                                                                                                                                                                                     |
| 19 <sup>th</sup> - 27 <sup>th</sup> August | Hamas violates ceasefire.                                                                                                                                                                                                                                                                                                                                                                                                                                                                                                                                                                                                                                                                                                                  | Hamas are radical fundamentalists and keep breaking ceasefire.                                                                                                                                                                                                                                                                                                                                                                                                                                                                                                                                                                                                                                                                | Hamas 'is all about hatred, violence and #terror'                                                                                                                                                                                                                                                                                                                                                                                                                                                                                                                                                                                                  | Ceasefire, long term Israeli security and destruction of Hamas infrastructure. Israel accepts ceasefire and Hamas eventually does because of Israel's military pressure.                                                                                                                                                                                                            |
|                                            |  <b>Israel Foreign Min.</b> <span>✓</span><br>@IsraelMFA <span>Following</span> <p>Hamas and ceasefires do not make a good match: One more ceasefire violated today by Hamas <a href="https://youtu.be/FTt3y8usqVI">youtu.be/FTt3y8usqVI</a> #Gaza</p>  <b>Israel Ceases, Hamas Fires</b><br><a href="http://bit.ly/1u3hLMi">http://bit.ly/1u3hLMi</a> Time after time, Israel accepts ceasefires in Gaza. Time after time, Hamas breaks ceasefires in Gaza. Hamas began the current fighting ...<br>youtube.com <p>8:24 PM - 19 Aug 2014</p> <p>39 Retweets 8 Likes</p> |  <b>Israel Foreign Min.</b> <span>✓</span><br>@IsraelMFA <span>Following</span> <p>The rocket fire on Israel today is a gross violation of the ceasefire. This is the 11th ceasefire that Hamas has either rejected or violated</p> <p>11:06 PM - 19 Aug 2014</p> <p>139 Retweets 44 Likes</p>                                                                                                                                                                                                                                                                                                                                               |  <b>Israel Foreign Min.</b> <span>✓</span><br>@IsraelMFA <span>Following</span> <p>#Hamas' armed military wing tweets a reminder of what this terrorist org is all about - hatred, violence &amp; #terror.</p>  <b>Al-Qassam Brigades</b> @Qassam_English · Aug 18<br>We are continuing our struggle. ALLAH IS OUR GOAL, THE PROPHET IS OUR LEADER, JIHAD IS OUR WAY, AND DEATH FOR ALLAH IS OUR MOST EXALTED WISH <p>3:02 PM - 19 Aug 2014</p> <p>111 Retweets 26 Likes</p> |  <b>Israel Foreign Min.</b> <span>✓</span><br>@IsraelMFA <span>Following</span> <p>Demilitarization of #Gaza is important not only to Israel (&amp; FM's of the EU), but for the future safety &amp; prosperity of Gaza's residents.</p> <p>3:56 PM - 22 Aug 2014</p> <p>25 Retweets 9 Likes</p> |
